# Supplementary material
Source: publisher figshare collection journal article supplement (https://asha.figshare.com/articles/dataset/_/16915663)
Supplement: Supplementary file 1 [file 1]

## Supplemental Material S 4:

### *Sample Conversation: Juan during Maintenance*

---

FS: Are you guys doing anything tomorrow? (*I-PFQ*)

P1: Tomorrow we're on a field trip.

FS: Yeah, what's it about? (*R-PFQ*)

P1: We're going to the SADD club which is an anti-drug club.//We made a video this year.//We do it every year and we compete with other schools to see who has the best anti-drug video.// So, were gonna do that tomorrow.

FS: Hopefully you guys win. (*R-PFC*)

P1: Hopefully we do, yeah.

FS: You hate losing? (*R-PFQ*)

P1: We lost pretty bad last time and I made a video last time too.// I kind of want some kind of redemption, but we'll see.

FS: (to P2) Do you hate losing anything, like competitions? (*R-PFQ*)

P2: I'm kind of competitive but sometimes I don't really care.//It's an inside thing.//You don't really show it at all.

P1: It's weird cause for me when I was doing cross country and I was in a race...unlike other sports it's not really that competitive because you are what matters most.//It's you and your best time.//How about you? Are you pretty competitive?

FS: I hate losing that's for sure.// I'm not really into competitive things.

P1: I mean, yeah, me neither.// I could never do a team sport cause I feel like it's a lot more competitive if you're like "oh we have to beat them."// I like feeling like it's one person doing their own thing.

---

P2: The burden!

P1: Yeah, cause I could not handle being like "oh I messed up so my team lost."

P2: Yeah, it feels like the worst.

FS: Yeah, it feels awful. (*R-PFC*)

P1: Wait, do you have a lot of experience doing team sports or anything?

FS: Well, I used to play baseball in the little league with the Pirates.// We sucked.

Note: FS = focus student, P = peer, R = response, I = initiation, PFQ = partner-focused question, PFC = partner-focused comment, // indicates segmentation
