# Supplementary material
Source: publisher figshare collection journal article supplement (https://asha.figshare.com/articles/dataset/_/16915663)
Supplement: Supplementary file 2 [file 1]

**Supplemental Material S3:** Individual means for all coded utterances: PF Skills, Non-partner-focused skills and other.

| Student/Act    | Baseline     | Intervention | Maintenance  | Generalization |              |
|----------------|--------------|--------------|--------------|----------------|--------------|
|                |              |              |              | Pre            | Post         |
| <b>Juan</b>    |              |              |              |                |              |
| PFQ (Total)    | <1.0 (0-1)   | 8.3 (5-17)   | 8.9 (4-17)   | 0              | 6.7 (4-10)   |
| Initiations    | 0            | 1.8 (0-4)    | 2.7 (1-5)    | 0              | 4.0 (3-5)    |
| Responses      | <1.0 (0-1)   | 6.5 (2-15)   | 5.2 (3-15)   | 0              | 2.7 (1-5)    |
| PFC (Total)    | <1.0 (0-1)   | 4.7 (0-8)    | 3.5 (0-7)    | 0              | 2.3 (2-3)    |
| Initiations    | 0            | <1.0 (0-1)   | 0            | 0              | 0            |
| Responses      | <1.0 (0-1)   | 4.6 (0-8)    | 3.5 (0-7)    | 0              | 2.3 (2-3)    |
| NPF (Total)    | 21.0 (9-40)  | 24.5 (7-41)  | 23.4 (13-38) | 72.3 (66-85)   | 65.3 (59-75) |
| Initiations    | 0            | <1.0 (0-1)   | <1.0 (0-1)   | 2.0 (1-4)      | <1.0 (0-1)   |
| Responses      | 21.0 (9-40)  | 24.4 (7-41)  | 23.0 (12-37) | 70.3 (62-84)   | 65.0 (59-75) |
| Other          | 2.7 (1-7)    | 5.2 (1-12)   | 5.8 (1-10)   | 9.7 (7-13)     | 9.0 (5-14)   |
| <b>Stephan</b> |              |              |              |                |              |
| PFQ (Total)    | <1.0 (0-1)   | 6.7 (1-12)   | -            | 0              | 3.3 (1-5)    |
| Initiations    | <1.0 (0-1)   | 1.8 (0-4)    | -            | 0              | 0            |
| Responses      | <1.0 (0-1)   | 4.9 (0-11)   | -            | 0              | 3.3 (1-5)    |
| PFC (Total)    | <1.0 (0-3)   | 2.4 (0-10)   | -            | <1.0 (0-2)     | 1.0 (0-2)    |
| Initiations    | 0            | <1.0 (0-1)   | -            | 0              | 0            |
| Responses      | <1.0 (0-3)   | 2.3 (0-10)   | -            | <1.0 (0-2)     | 1.0 (0-2)    |
| NPF (Total)    | 62.3 (54-71) | 40.0 (25-57) | -            | 79.7 (73-85)   | 63.0 (59-68) |
| Initiations    | 1.2 (0-3)    | 1.3 (0-9)    | -            | <1.0 (0-2)     | 0            |
| Responses      | 61.3 (53-70) | 38.8 (20-57) | -            | 79.0 (73-85)   | 63.0 (59-68) |
| Other          | 9.3 (4-13)   | 9.1 (1-15)   | -            | 17.7 (16-20)   | 8.3 (6-11)   |
| <b>Nicolas</b> |              |              |              |                |              |
| PFQ (Total)    | 1.6 (0-4)    | 11.3 (6-21)  | 10.2 (2-21)  | 1.7 (1-2)      | 3.0 (0-9)    |
| Initiations    | <1.0 (0-1)   | 2.5 (0-5)    | 2.0 (1-4)    | <1.0 (0-1)     | 0            |
| Responses      | 1.5 (0-4)    | 8.9 (4-15)   | 8.2 (1-17)   | 1.3 (1-2)      | 3 (0-9)      |
| PFC (Total)    | 1.3 (0-3)    | 4.9 (0-13)   | 8.4 (3-11)   | 1.7 (1-2)      | <1.0 (0-2)   |
| Initiations    | 0            | <1.0 (0-1)   | 0            | 0              | 0            |
| Responses      | 1.3 (0-3)    | 4.9 (0-13)   | 8.4 (3-11)   | 1.7 (1-2)      | <1.0 (0-2)   |
| NPF (Total)    | 35.0 (13-57) | 32.0 (16-57) | 21.4 (10-34) | 52.0 (33-64)   | 68.3 (44-86) |
| Initiations    | 1.5 (0-4)    | 1.0 (0-4)    | 0.6 (0-2)    | 1.0 (0-3)      | <1.0 (0-1)   |
| Responses      | 33.4 (11-55) | 31.0 (16-53) | 67.7 (44-85) | 51.0 (33-64)   | 67.7 (44-85) |
| Other          | 13.7 (7-25)  | 19.7 (10-41) | 12.4 (6-17)  | 22.0 (16-28)   | 22.3 (12-28) |

*Note.* PFQ = Partner-focused questions. PFC = Partner-focused comments. NPF = Non-partner focused utterances.
