# Supplementary material
Source: publisher figshare collection journal article supplement (https://asha.figshare.com/articles/dataset/_/16915663)
Supplement: Supplementary file 3 [file 1]

## Supplemental Material S5

*Sample Conversation: Stephan, during Intervention, and Nicolas, during Maintenance*

| Stephan                                                                                                 | Nicolas                                                                                                                                                                                                     |
|---------------------------------------------------------------------------------------------------------|-------------------------------------------------------------------------------------------------------------------------------------------------------------------------------------------------------------|
| FS: How was your day? ( <i>I-PFQ</i> )                                                                  | P1: Oh, so I got a big surprise yesterday.                                                                                                                                                                  |
| P1: Mine?// It got much better since this morning.                                                      | FS: What was it? ( <i>R-PFQ</i> )                                                                                                                                                                           |
| FS: How's that? ( <i>R-PFQ</i> )                                                                        | P1: Like my brother came home out of nowhere just to say like hi and bye because all of a sudden my other brother is moving with my brother.// Like they're both moving to South Carolina and they just.... |
| P1: Oh because disappointment hit me when I thought I would finish something when I didn't.             |                                                                                                                                                                                                             |
| FS: Disappointment?                                                                                     | P2: What?                                                                                                                                                                                                   |
| P1: Yeah, disappointment.// That's the only time I get sad or mad is disappointment.                    | P1: Yeah, they just left yesterday out of nowhere.//I was like well, bye.                                                                                                                                   |
| FS: Don't worry about it.// ( <i>R-PFC</i> ). You always feel better in the morning.// ( <i>R-PFC</i> ) | FS: So wait, like who is in your house now since your brothers left? ( <i>R-PFQ</i> )                                                                                                                       |
| P1: Thanks man.                                                                                         | P1: Just me, my mom, and my dad.                                                                                                                                                                            |
|                                                                                                         | FS: Wait....                                                                                                                                                                                                |
|                                                                                                         | P1: Yeah and the dogs.                                                                                                                                                                                      |
|                                                                                                         | FS: Like any other siblings in there too? ( <i>R-PFQ</i> )                                                                                                                                                  |
|                                                                                                         | P1: No, because my sister has her own house with her kids.                                                                                                                                                  |
|                                                                                                         | FS: Wow ( <i>R-PFC</i> )                                                                                                                                                                                    |
|                                                                                                         | P1: So it just got really empty really fast.                                                                                                                                                                |
|                                                                                                         | FS: So, it's just ya'll three and the two dogs. ( <i>R-PFC</i> )                                                                                                                                            |
|                                                                                                         | P1: Yep.                                                                                                                                                                                                    |
|                                                                                                         | FS: Wow it must be hard. ( <i>R-PFC</i> )                                                                                                                                                                   |

Note: FS = focus student, R = response, I = initiation, PFQ = partner-focused question, PFC = partner-focused comment, // indicates segmentation
