# Supplementary material
Source: publisher figshare collection journal article supplement (https://asha.figshare.com/articles/dataset/_/16915663)
Supplement: Supplementary file 4 [file 1]

*Graphic for Showing Interest*

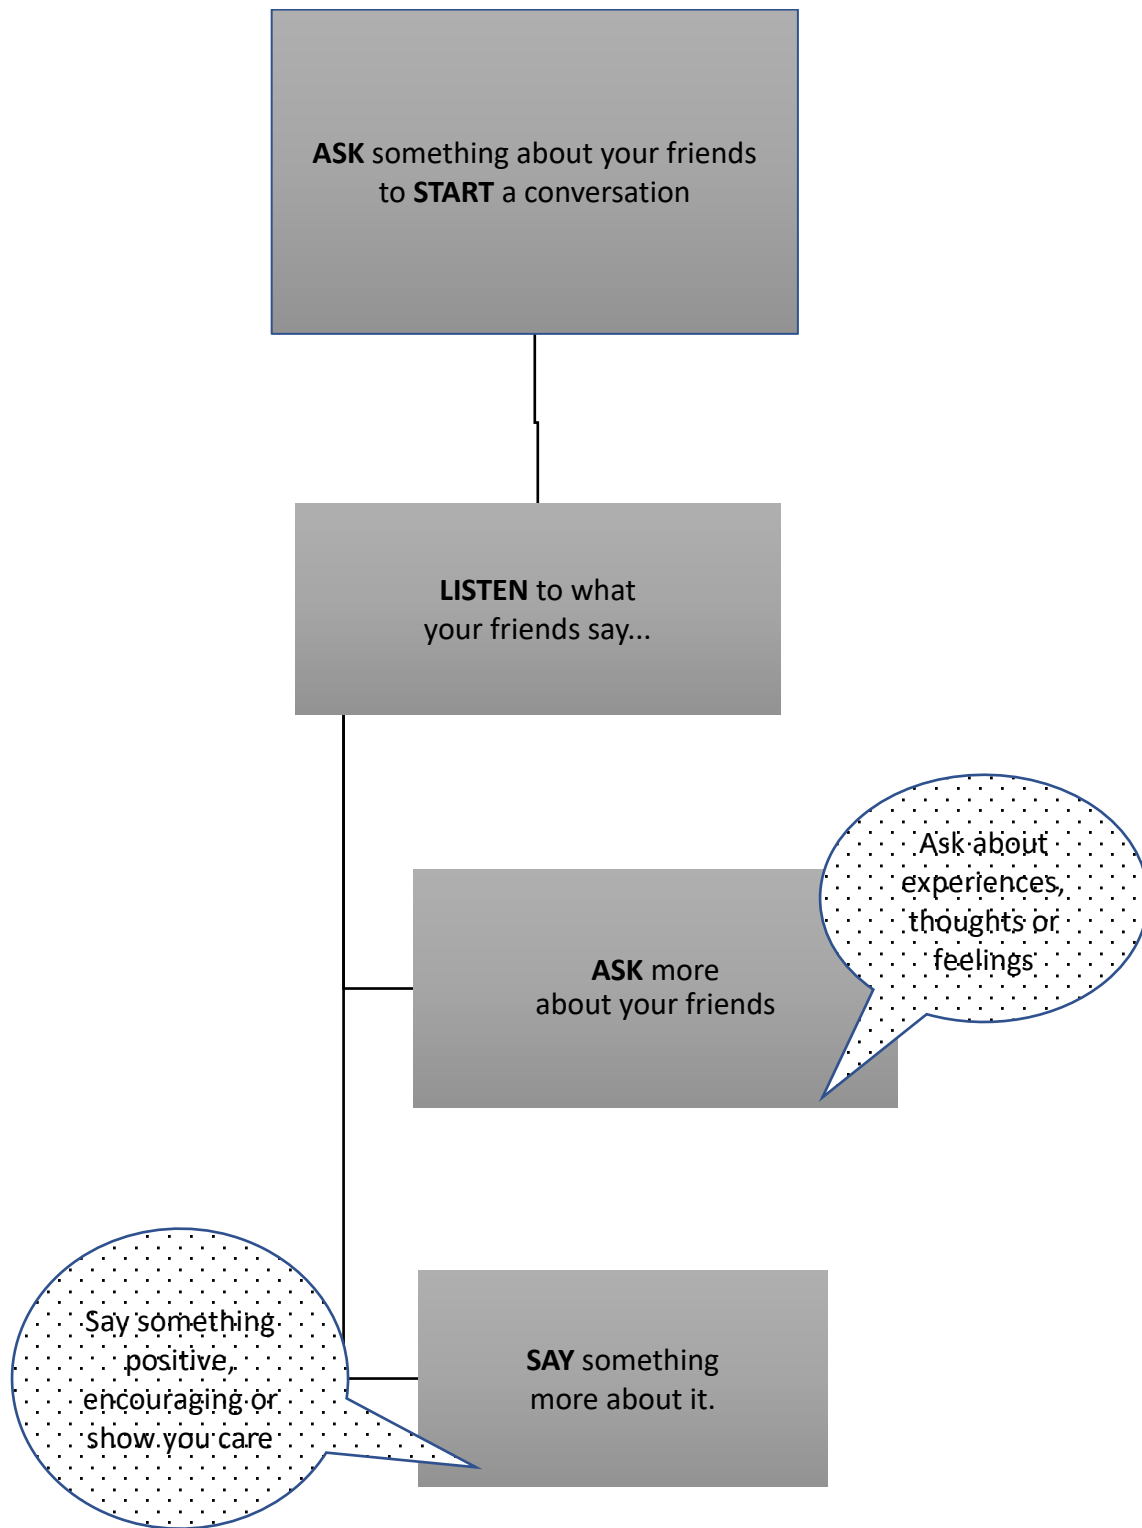

**Supplemental Material S1:** Graphic used during student training illustrating partner-focused skills for showing interest in peer conversation partners.
