# Supplementary material
Source: publisher figshare collection journal article supplement (https://asha.figshare.com/articles/dataset/_/16915663)
Supplement: Supplementary file 5 [file 1]

Name: \_\_\_\_\_

Date: \_\_\_\_\_

## SHOWING INTEREST IN OTHERS

- ◆ Give an example of a QUESTION you used to START a conversation to show interest in your friends.

○ \_\_\_\_\_

- ◆ Give an example of a follow-up question you used to ask more about your friends' experiences, thoughts or feelings.

○ \_\_\_\_\_

- ◆ Give an example of a statement you made that was positive, gave encouragement/advice or was empathetic.

○ \_\_\_\_\_

*How can I improve to show more interest in my friends?*

*What are some ideas for starting a conversation tomorrow?*

1. \_\_\_\_\_

2. \_\_\_\_\_

3. \_\_\_\_\_

**Supplemental Material S2:** Self-reflection cue sheet used by the student after a conversation to self-reflect and before the next conversation to cue or remind the student to use partner-focused skills.
